# Supplementary material
Source: publisher figshare collection journal article supplement (https://karger.figshare.com/ndownloader/files/21846897)
Supplement: Supplementary file 1 [file 21846897]

**Supplementary File 1. Participants who completed the study compared to non-completers**

|  | **COMPLETE** | | **NON COMPLETE** | |
| --- | --- | --- | --- | --- |
| **Characteristic** | **n** | **%** | **n** | **%** |
| **Total** | **98** |  | **18** |  |
| Age mean (range) | 41.8 | (19-73) | 42.6 (19-69) | |
| Gender |  |  |  |  |
| Male | 31 | (31.6) | 5 | (27.8) |
| Female | 67 | (68.4) | 13 | (72.2) |
| Educational attainment |  |  |  |  |
| Completed junior high school | 0 |  | 1 | (5.6) |
| Completed senior high school | 9 | (9.2) | 3 | (16.7) |
| Trade or technical certificate | 16 | (16.3) | 4 | (22.2) |
| University degree/ diploma | 73 | (74.5) | 10 | (55.6) |
| Work |  |  |  |  |
| Full-time (including self-employed) | 61 | (62.2) | 10 | (55.6) |
| Part-time or casual | 20 | (20.4) | 4 | (22.2) |
| Student | 9 | (9.2) | 2 | (11.1) |
| Retired, full-time home duties/home carer or unemployed | 8 | (8.2) | 1 | (5.6) |
| Marital status |  |  |  |  |
| Married or living together | 76 | (77.6) | 13 | (72.2) |
| Divorced or separated | 7 | (7.1) | 1 | (5.6) |
| Single/never married | 15 | (15.3) | 4 | (22.2) |
| Previous skin cancer excised |  |  |  |  |
| Yes | 60 | (61.2) | 11 | (61.1) |
| No or unsure | 38 | (38.8) | 7 | (38.9) |
| Skin type |  |  |  |  |
| Very fair | 34 | (34.7) | 5 | (27.8) |
| Fair | 53 | (54.1) | 10 | (55.6) |
| Medium | 10 | (10.2) | 2 | (11.1) |
| Dark | 1 | (1.0) | 1 | (5.6) |
| Number moles |  |  |  |  |
| None or a few (0-20) | 31 | (31.6) | 8 | (44.4) |
| Some (20-50) | 39 | (39.8) | 6 | (33.3) |
| Many (more than 50) | 28 | (28.6) | 4 | (22.2) |
| Eye colour |  |  |  |  |
| Blue/Grey | 52 | (53.1) | 12 | (66.7) |
| Green | 28 | (28.6) | 2 | (11.1) |
| Hazel/ Brown | 18 | (18.4) | 4 | (22.2) |

**Supplementary File 2. Consumer acceptance of mobile teledermoscopy-enhanced SSE**

Abbreviations: MTD=mobile teledermoscopy; SSE=skin self-examination

**Supplementary File 3. Linear Regression TAM change score**

| **Characteristic** | **Mean change score (SE)** | **β (95% CI)** | **P value** |
| --- | --- | --- | --- |
| **Total** |  |  |  |
| Gender |  |  |  |
| Males | -0.28 (0.08) | ref |  |
| Females | -0.17 (0.05) | -0.11 (-0.30 – 0.08) | .24 |
| Educational attainment |  |  |  |
| University degree/ diploma | -0.21 (0.05) | ref |  |
| Trade or technical certificate | -0.22 (0.11) | 0.08 (-0.29 – 0.45) | .68 |
| Completed senior high school | -0.14 (0.12) | 0.07 (-0.25 – 0.38) | .67 |
| Work |  |  |  |
| Full-time (including self-employed) | -0.19 (0.45) | ref |  |
| Part-time or casual | -0.22 (0.11) | -0.14 (-0.49 – 0.22) | .45 |
| Student | -0.11 (0.13) | 0.01 (-0.25 – 0.25) | .97 |
| Retired, full-time home duties/home carer or unemployed | -0.37 (0.13) | 0.21 (-0.13 – 0.54) | .22 |
| Marital status |  |  |  |
| Married or living together | -0.21 (0.05) | ref |  |
| Divorced or separated | -0.12 (0.17) | -0.09 (-0.44 – 0.25) | .59 |
| Single/never married | -0.20 (0.09) | -0.01 (-0.26 – 0.24) | .92 |
| Previous skin spot, mole, or other spot/s removed or treated? |  |  |  |
| Yes | -0.16 (0.06) | ref |  |
| No | -0.28 (0.07) | 0.12 (-0.06 – 0.31) | .19 |
| Skin type |  |  |  |
| Very fair | -0.25 (0.07) | ref |  |
| Fair | -0.18 (0.06) | -0.07 (-0.26 – 0.13) | .50 |
| Medium or Dark Skin | -0.18 (0.15) | -0.07 (-0.37 – 0.24) | .66 |
| Number moles |  |  |  |
| Many (more than 50) | -0.27 (0.10) | ref |  |
| Some (20-50) | -0.14 (0.06) | -0.12 (-0.34 – 0.10) | .27 |
| None or a few (0-20) | -0.25 (0.08) | -0.03 (-0.27 – 0.19) | .76 |
| Eye colour |  |  |  |
| Blue/Grey | -0.23 (0.06) | ref |  |
| Green/Hazel | -0.15 (0.08) | -0.09 (-0.29 – 0.12) | .40 |
| Brown/Black | -0.22 (0.13) | -0.02 (-0.26 – 0.23) | .90 |
